# Supplementary material
Source: publisher figshare collection journal article supplement (https://acs.figshare.com/ndownloader/files/14066285)
Supplement: Supplementary file 1 [file 14066285]

## Supporting Information

### Co-design of Combinatorial Organosolv Pretreatment (COP) and Lignin Nanoparticles (LNPs) in Biorefineries

**Zhi-Hua Liu <sup>a, b</sup>, Naijia Hao <sup>c</sup>, Somnath Shinde <sup>c</sup>, Michelle L. Olson <sup>d</sup>, Samarthya Bhagia <sup>c</sup>, John R. Dunlap <sup>e</sup>, Katy C. Kao <sup>d</sup>, Xiaofeng Kang <sup>f, g</sup>, Arthur J. Ragauskas <sup>c, h</sup>, Joshua S. Yuan <sup>a, b, d \*</sup>**

<sup>a</sup> Synthetic and Systems Biology Innovation Hub (SSBiH), Texas A&M University, Norman E. Borlaug Center, 2123 TAMU, College Station, TX 77843, USA

<sup>b</sup> Department of Plant Pathology and Microbiology, Texas A&M University, Norman E. Borlaug Center, 2123 TAMU, College Station, TX 77843, USA

<sup>c</sup> Department of Chemical & Biomolecular Engineering, University of Tennessee, Nathan W. Dougherty Engineering Building, 1512 Middle Dr., Knoxville, TN 37996, USA

<sup>d</sup> Department of Chemical Engineering, Texas A&M University, Jack E. Brown Engineering Building, 3122 TAMU, College Station, TX 77843, USA

<sup>e</sup> Advanced Microscopy and Imaging Center, University of Tennessee, Science and Engineering Research Facility, 1414 Circle Dr., Knoxville, TN 37996, USA

<sup>f</sup> Department of Molecular & Cellular Medicine, Texas A&M University, Reynolds Medical Building, 206 Olsen Blvd., College Station, TX 77843, USA

<sup>g</sup> Key Laboratory of Synthetic and Natural Functional Molecular Chemistry, College of Chemistry & Materials Science, Northwest University, Xi'an 710069, PR China

<sup>h</sup> Biosciences Division, Oak Ridge National Laboratory, Oak Ridge, TN 37830, USA

\*Corresponding contributor. E-mail: [syuan@tamu.edu](mailto:syuan@tamu.edu)

---

Number of Pages: 10

Number of Table: 1

Number of Figures: 7

Table S1 Compositions in pretreated solid from combinatorial organosolv pretreatment (COP) with controlled pH

|          | Glucan | SD  | Xylan | SD  | Arabinan | SD  | Lignin (AIL) | SD  | Lignin (ASL) | SD  | Ash | SD  | Total |
|----------|--------|-----|-------|-----|----------|-----|--------------|-----|--------------|-----|-----|-----|-------|
| Step 1   |        |     |       |     |          |     |              |     |              |     |     |     |       |
| Case 1-5 | 34.1   | 0.1 | 16.0  | 0.1 | 1.0      | 0.2 | 17.6         | 0.6 | 1.7          | 0.0 | 8.0 | 0.0 | 78.3  |
| Case 6   | 37.9   | 1.3 | 19.0  | 0.8 | 0.4      | 0.0 | 13.3         | 2.7 | 1.2          | 0.0 | 1.8 | 0.0 | 73.6  |
| Step 2   |        |     |       |     |          |     |              |     |              |     |     |     |       |
| Case 1   | 57.5   | 0.5 | 11.0  | 0.2 | 0.0      | 0.0 | 10.4         | 1.4 | 1.1          | 0.0 | 8.4 | 0.0 | 88.4  |
| Case 2   | 40.5   | 1.3 | 16.4  | 0.6 | 0.9      | 0.2 | 15.0         | 0.1 | 1.5          | 0.0 | 6.4 | 0.0 | 80.7  |
| Case 3   | 36.5   | 0.8 | 17.8  | 1.4 | 1.1      | 0.1 | 18.5         | 0.0 | 1.6          | 0.0 | 7.6 | 0.0 | 83.1  |
| Case 4   | 48.2   | 0.2 | 21.6  | 0.3 | 1.2      | 0.0 | 9.3          | 0.6 | 1.2          | 0.0 | 8.1 | 0.0 | 89.6  |
| Case 5   | 51.2   | 1.5 | 11.1  | 0.2 | 0.0      | 0.0 | 14.0         | 0.6 | 1.1          | 0.0 | 6.8 | 0.0 | 84.3  |
| Case 6   | 55.7   | 0.8 | 13.4  | 0.2 | 0.0      | 0.0 | 13.1         | 0.5 | 0.8          | 0.0 | 2.0 | 0.0 | 85.0  |

AIL represents acid insoluble lignin; ASL represents acid soluble lignin. SD represents standard deviation.

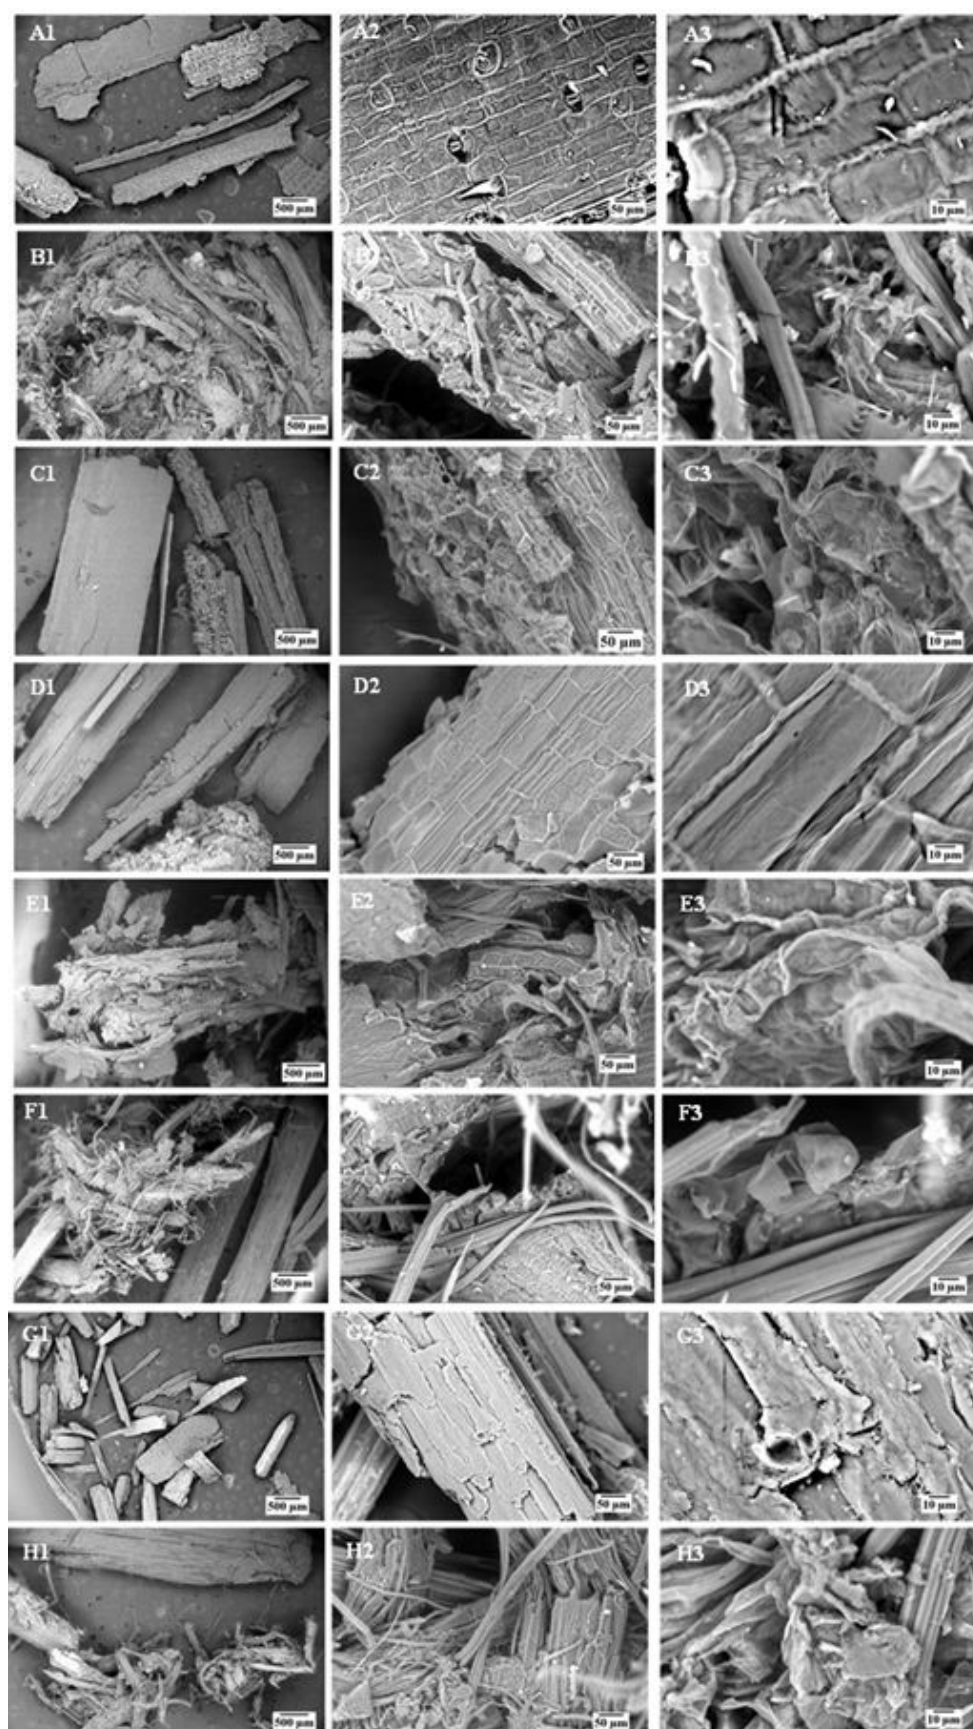

Figure S1 Scanning electron microscopy (SEM) images of untreated and pretreated corn stover and switchgrass. A1-3, untreated corn stover; B1-3, corn stover pretreated with LHW followed by EtOH+SA; C1-3, corn stover pretreated with LHW followed by EtOH+FA; D1-3, corn stover pretreated with LHW followed by EtOH; E1-3, corn stover pretreated with LHW followed by EtOH+SH; F1-3, corn stover pretreated with LHW followed by MeOH+SA; G1-3, untreated switchgrass; H1-3, switchgrass pretreated with LHW followed by EtOH+SA. Pretreatment strategies were described in Table 1. LHW represents liquid hot water; EtOH+SA represents ethanol plus sulfuric acid; EtOH+FA represents ethanol plus formic acid; EtOH+SH represents ethanol plus sodium hydroxide. Left, middle, and right columns show ~50, 500 and 2000 times magnification, and scale bars of 500, 50 and 10  $\mu\text{m}$ , respectively.

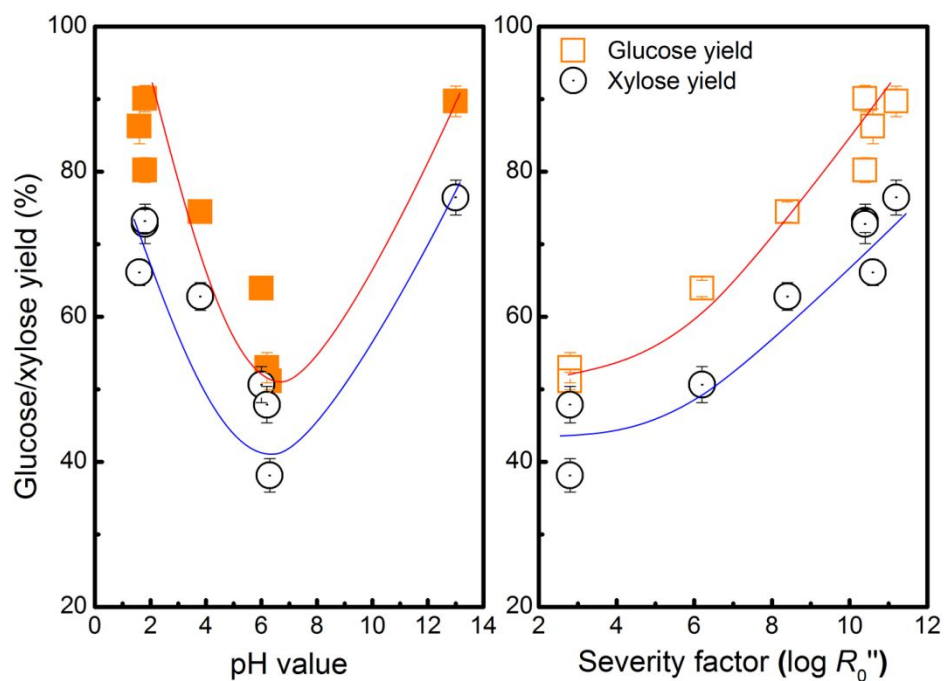

Figure S2 Correlations of glucose/xylose yield with pH value and severity factor of combinatorial organosolv pretreatment (COP) with controlled pH

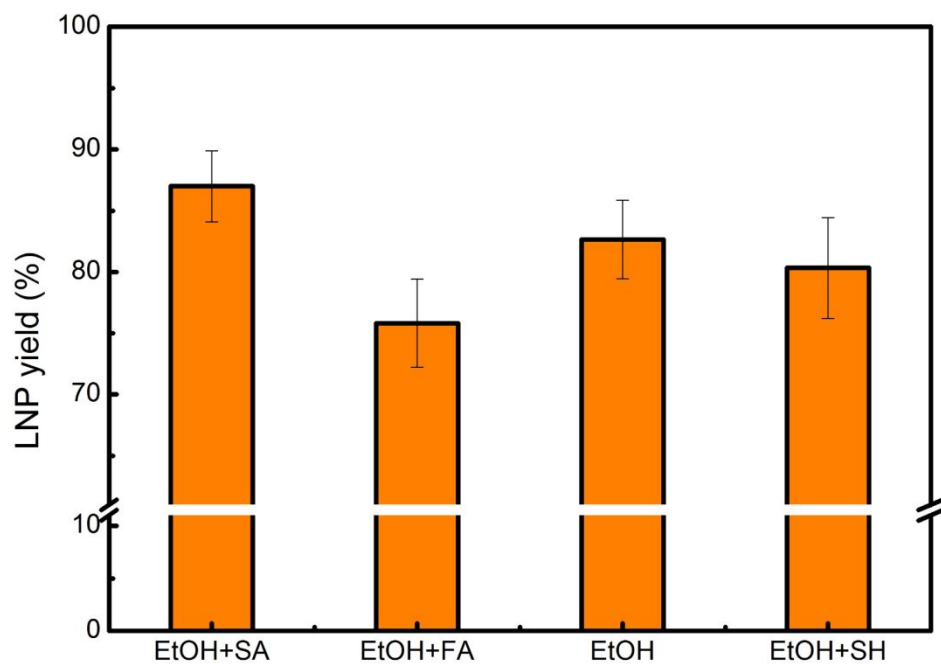

Figure S3 The yield of lignin nanoparticles (LNPs) fabricated from the lignin fractionated by combinatorial organosolv pretreatment (COP) with controlled pH. EtOH+SA represents ethanol plus sulfuric acid; EtOH+FA represents ethanol plus formic acid; EtOH+SH represents ethanol plus sodium hydroxide

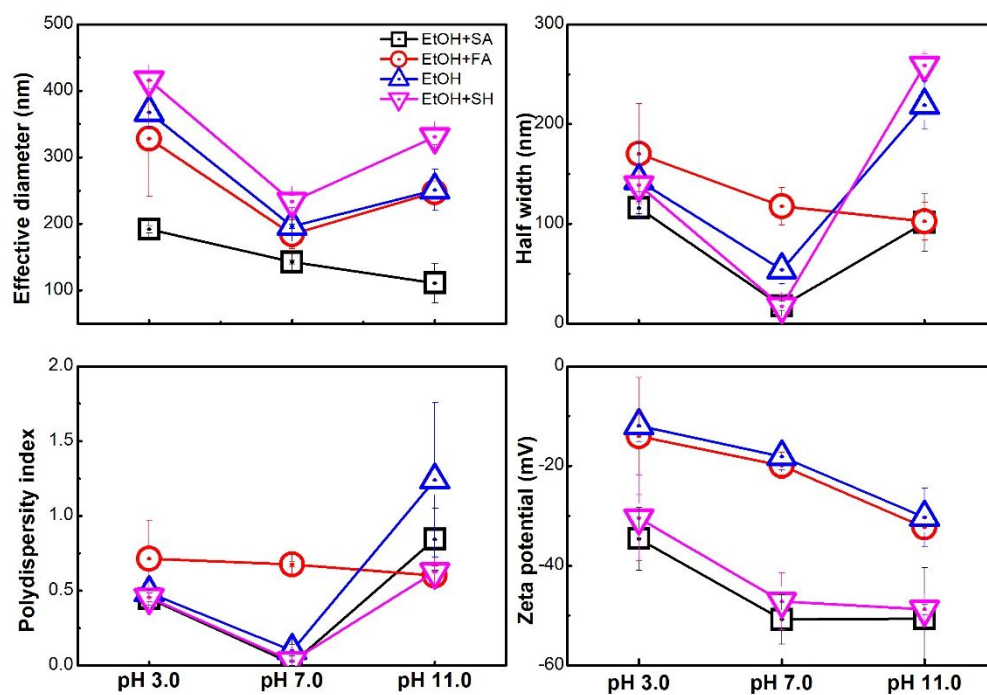

Figure S4 Effects of pH value of the dispersion on the stability of lignin nanoparticles (LNPs) fabricated from the lignin fractionated by combinatorial organosolv pretreatment (COP). Pretreatment strategies were described in Table 1. EtOH+SA represents ethanol plus sulfuric acid; EtOH+FA represents ethanol plus formic acid; EtOH+SH represents ethanol plus sodium hydroxide

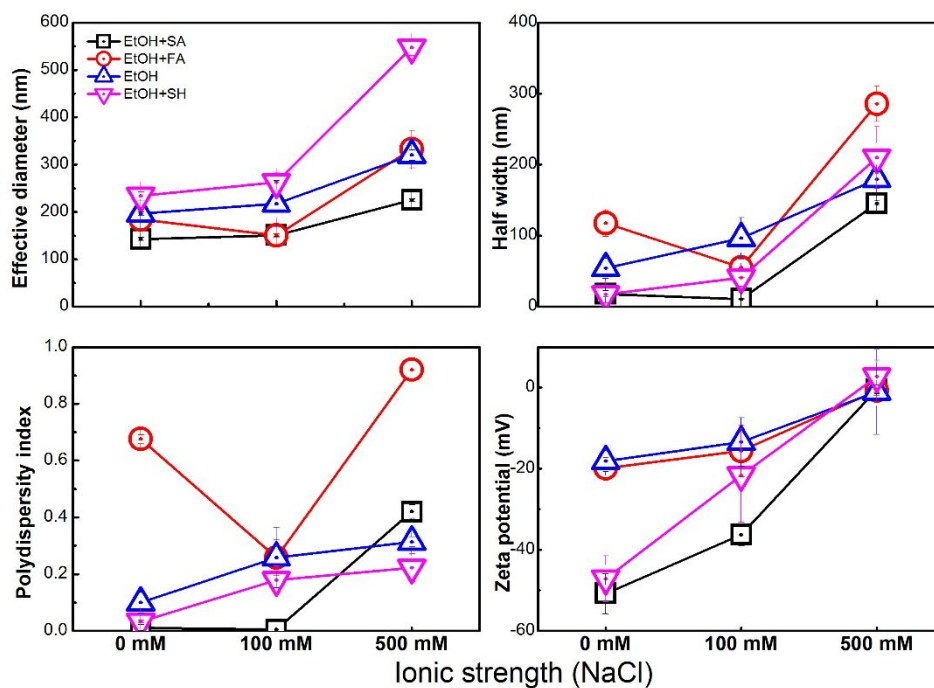

Figure S5 Effects of NaCl concentration on the stability of lignin nanoparticles (LNPs) fabricated from the lignin fractionated by combinatorial organosolv pretreatment (COP). Pretreatment strategies were described in Table 1. EtOH+SA represents ethanol plus sulfuric acid; EtOH+FA represents ethanol plus formic acid; EtOH+SH represents ethanol plus sodium hydroxide



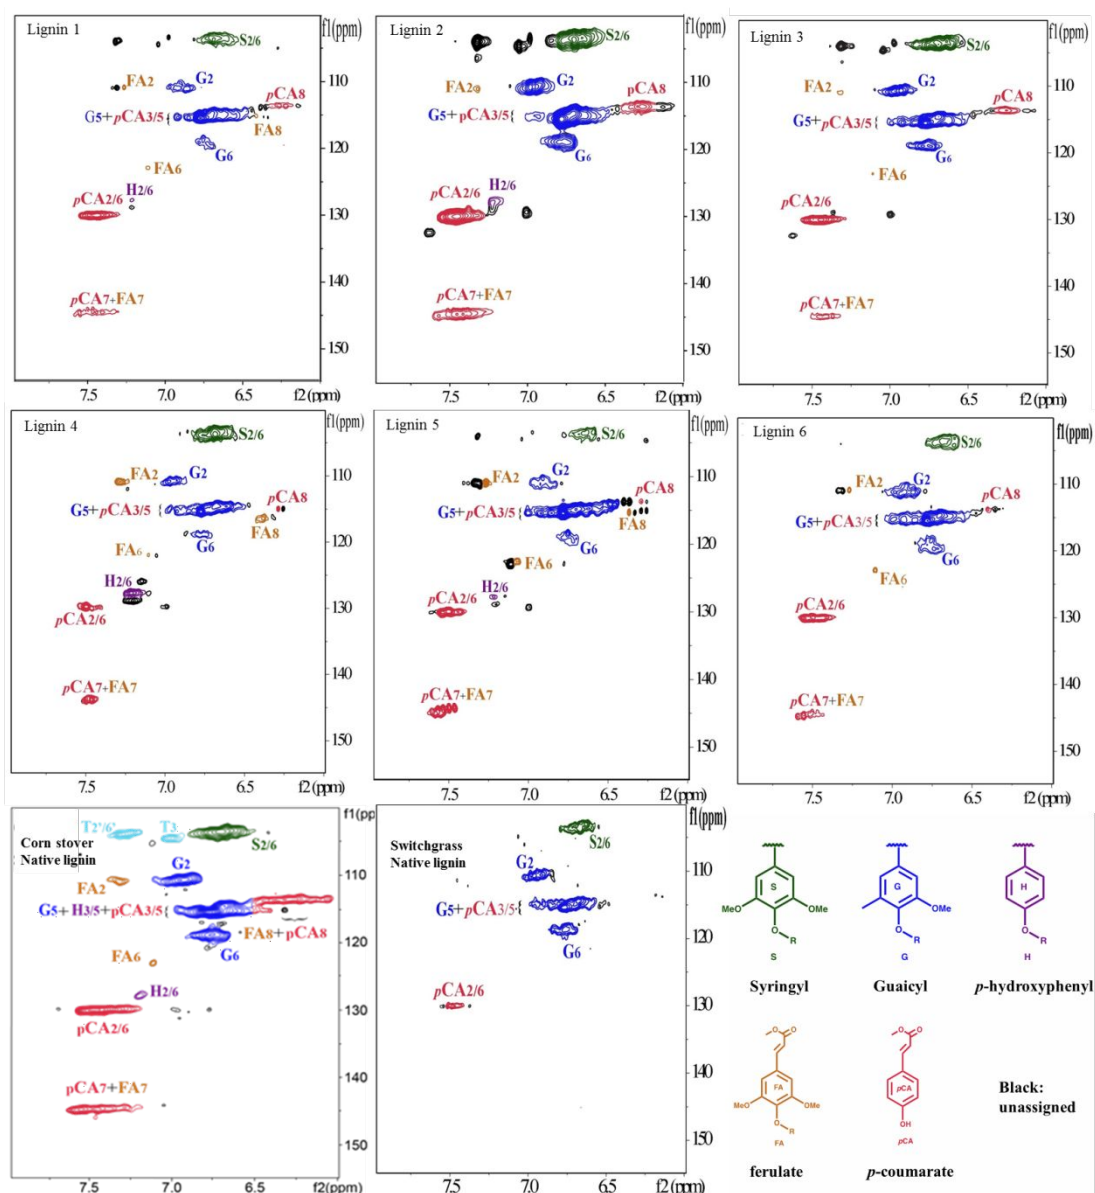

Figure S6 Aromatic and lignin interunit regions of 2D HSQC NMR spectra of the fractionated lignin from each combinatorial organosolv pretreatment (COP). Lignin 1 represents the fractionated lignin produced by COP Case 1 described in Table 1. Lignin 1-5 was fractionated from corn stover while lignin 6 was fractionated from switchgrass

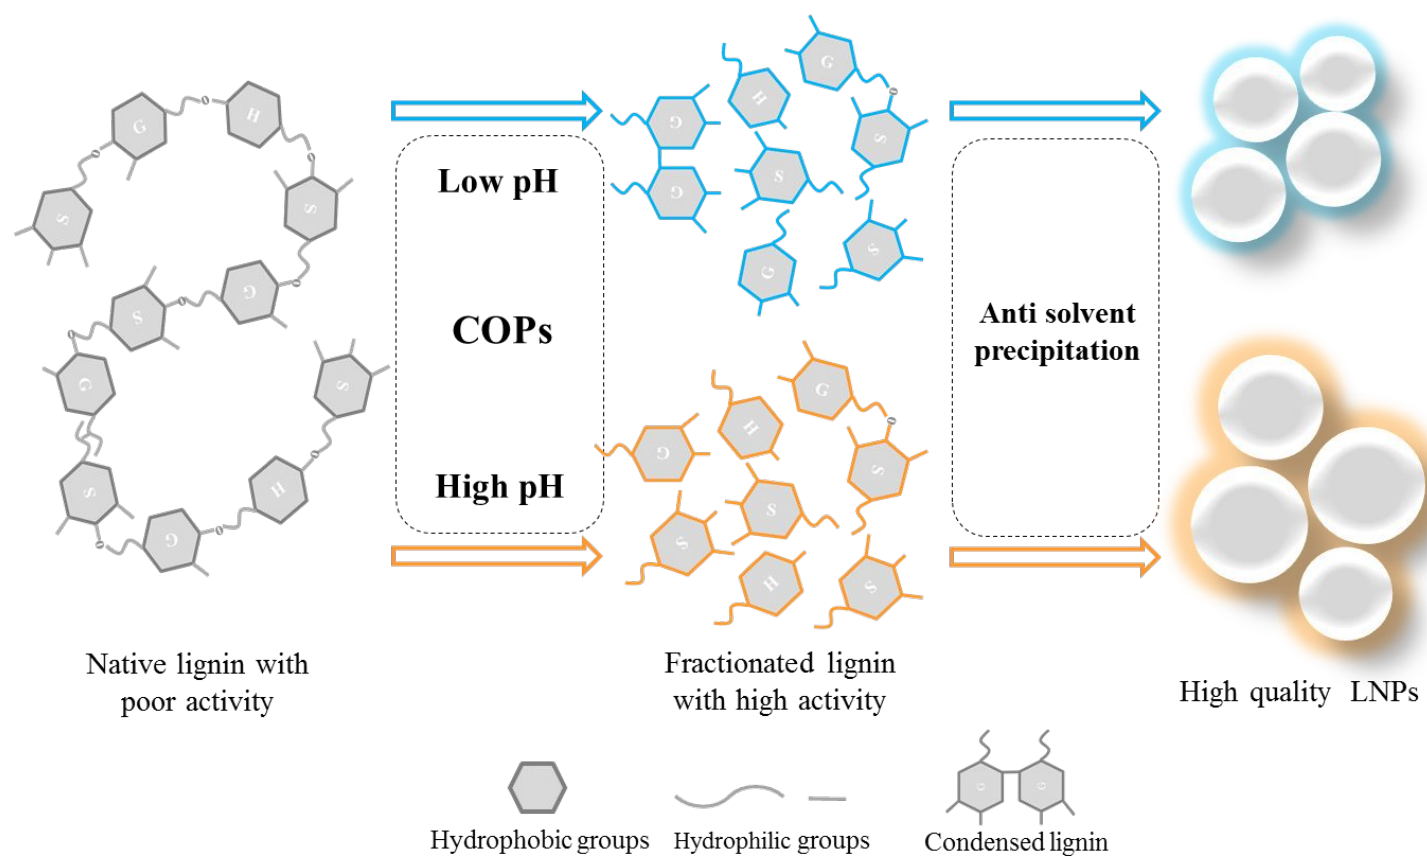

Figure S7 Proposed formation mechanism model of lignin nanoparticles (LNPs) from corn stover lignin produced by combinatorial organosolv pretreatment (COP) with controlled pH.
